# Supplementary material for: Extended Co-Expression of Inhibitory Receptors by Human CD8 T-Cells Depending on Differentiation, Antigen-Specificity and Anatomical Localization
Source: PubMed Central journal article supplement (PMC3275569; doi:10.1371/journal.pone.0030852), 2012-02-08
Supplement: pone.0030852.s006.pdf [file pone.0030852.s006.pdf]

## Supplementary Tables

**Supplementary Table 1** Inhibitory receptors and their respective ligands

| <b>inhibitory<br/>receptor</b> | <b>ligand</b> | <b>inhibitory<br/>receptor</b> | <b>ligand</b> |
|--------------------------------|---------------|--------------------------------|---------------|
| KLRG-1                         | E-cadherin    | LAG-3                          | MHC-II        |
| TIM-3                          | galectin-9    | BTLA                           | HVEM          |
| PD-1                           | PD-L1 / PD-L2 | 2B4                            | CD48          |
| CD160                          | HVEM          | CTLA-4                         | CD80 / CD86   |
